# Supplementary material for: Diabetes Treatments and Risks of Adverse Breast Cancer Outcomes among Early-Stage Breast Cancer Patients: A SEER-Medicare Analysis
Source: Oxford University Press journal article supplement (doi:10.1158/0008-5472.can-17-0687), 2017-09-21
Supplement: 00085472can170687-sup-180108_3_supp_4258476_kvzc94.xlsx [file 00085472can170687-sup-180108_3_supp_4258476_kvzc94.xlsx]

## Sheet: Sheet1
	Included in the study	Not eligible due to enrollment requirement
	(n=14766)	(n=32283)
	n (%)	n (%)
Year of diagnosis
2007	2873 (19.5)	5948 (18.4)
2008	2921 (19.8)	6219 (19.3)
2009	2935 (19.9)	6586 (20.4)
2010	2944 (19.9)	6630 (20.5)
2011	3093 (20.9)	6900 (21.4)
Age at diagnosis (years)
66-70	5804 (39.3)	13686 (42.4)
71-75	4937 (33.4)	10309 (31.9)
76-80	4025 (27.3)	8288 (25.7)
Race/Ethnicity
Non-Hispanic white	11899 (81.0)	24827 (77.4)
African American	1120 ( 7.6)	2736 ( 8.5)
Hispanic white	887 ( 6.0)	2332 ( 7.3)
Asian/Pacific Islander	729 ( 5.0)	2084 ( 6.5)
American Indian/Native American	49 ( 0.3)	103 ( 0.3)
Unknown	82	201
Marital status
Married	6895 (46.7)	17192 (53.3)
Widowed	4043 (27.4)	7696 (23.8)
Single/Unmarried	1368 ( 9.3)	2595 ( 8.0)
Other	2460 (16.7)	4800 (14.8)
Stage at diagnosis
I	9410 (63.7)	20881 (64.7)
II	5356 (36.3)	11402 (35.3)
ER/PR status
ER+/PR+	10413 (73.7)	22674 (73.6)
ER-/PR-	1908 (13.5)	4062 (13.2)
ER+/PR-	1707 (12.1)	3889 (12.6)
ER-/PR+	103 ( 0.7)	181 ( 0.6)
Missing	635	1477
Receipt of complete first course treatment
No	2550 (17.3)	6250 (19.4)
Yes	12216 (82.7)	26033 (80.6)
