# Supplementary material for: Diabetes Treatments and Risks of Adverse Breast Cancer Outcomes among Early-Stage Breast Cancer Patients: A SEER-Medicare Analysis
Source: Oxford University Press journal article supplement (doi:10.1158/0008-5472.can-17-0687), 2017-09-21
Supplement: 00085472can170687-sup-180108_3_supp_4258477_8vzc94.docx [file 00085472can170687-sup-180108_3_supp_4258477_8vzc94.docx]

Supplemental Table 2. Patterns of diabetes medication use among women with diabetes during study follow up

|  | Used metformin  (n=2,257) | Used sulfonylurea  (n=1,604) | Used insulin  (n=1,051) | Used other diabetes medications  (n=1,164) |
| --- | --- | --- | --- | --- |
|  | n (col %) | n (col %) | n (col %) | n (col %) |
| Used metformin | 728 (32.26%)* | 1107 (69.01%) | 537 (51.09%) | 842 (72.34%) |
| Used sulfonylurea | 1107 (49.05%) | 237 (14.78%)* | 504 (47.95%) | 694 (59.62%) |
| Used insulin | 537 (23.79%) | 504 (31.42%) | 270 (25.69%)* | 423 (36.34%) |
| Used other diabetes treatment | 842 (37.31%) | 694 (43.27%) | 423 (40.25%) | 88 (7.56%)* |

*Defined as women exclusively used the given medication throughout the study period
